# Supplementary material for: Evaluation of the diagnostic ability of laminin gene family for pancreatic ductal adenocarcinoma
Source: Aging (Albany NY). 2019 Jun 10;11(11):3679–703. doi: 10.18632/aging.102007 (PMC6594799; doi:10.18632/aging.102007)
Supplement: Supplementary Figures [file aging-11-102007-s002.pdf]

Supplementary Figures

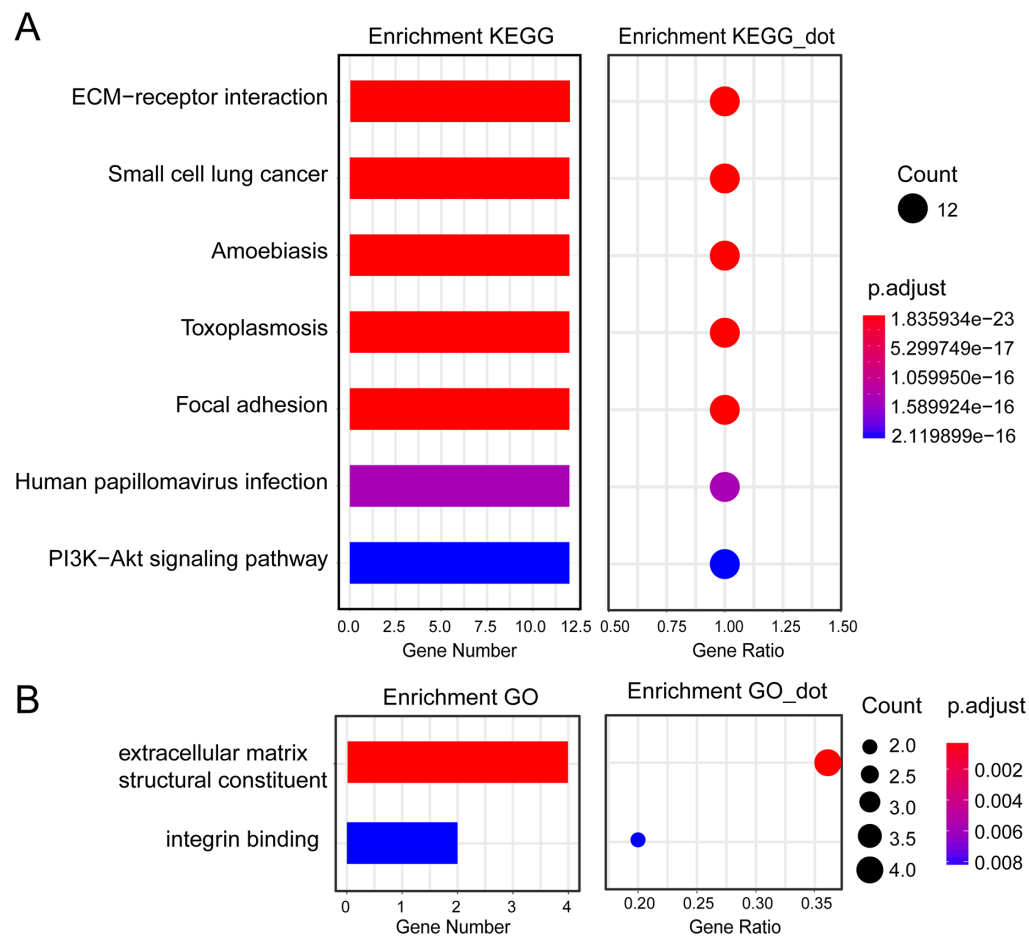

**Supplementary Figure 1.** (A) KEGG pathway and (B) GO term enrichment plots of genes of the laminin family enriched obtained through the *Clusterprofiler* R package.



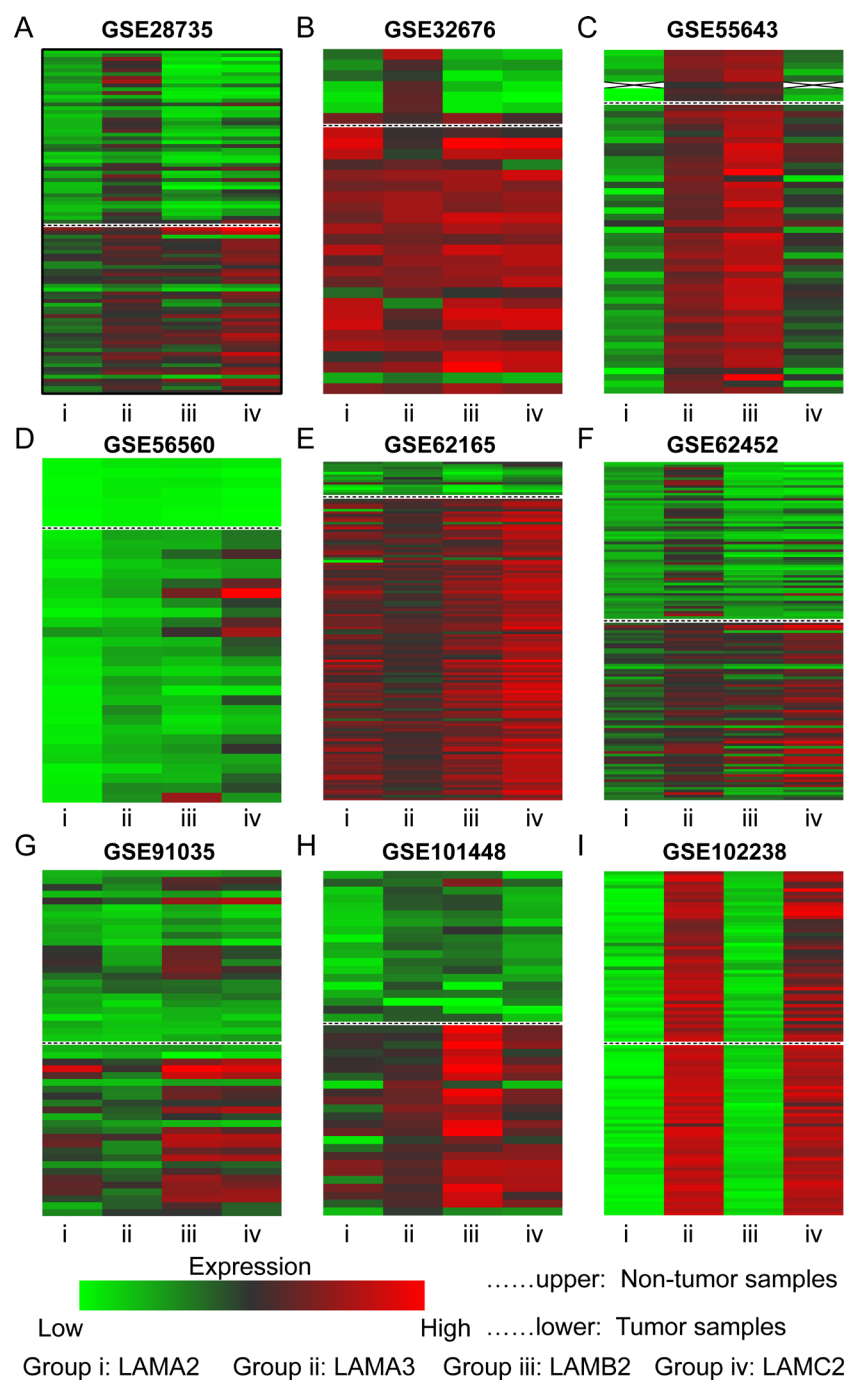

**Supplementary Figure 3. Heatmap for LAMA3, LAMA4, LAMB3 and LAMC2 expression levels in GEO PDAC and non-tumor tissues.** Green and red colors represent low and high mRNA expression levels, respectively. Group i-iv represent LAMA3, LAMA4, LAMB3 and LAMC2, respectively.

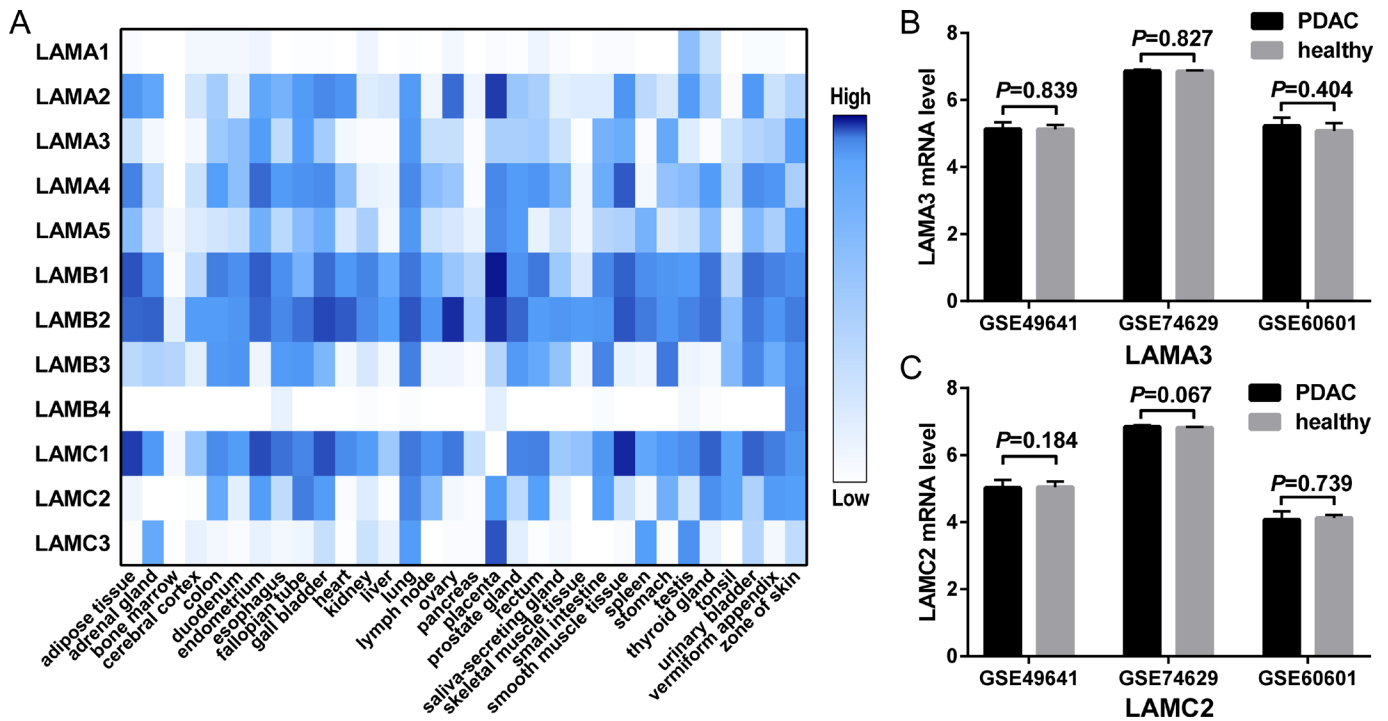

**Supplementary Figure 4.** (A) Expression of genes of the laminin family in GTEx normal tissues. (B–C) Expression of LAMA3 and LAMC2 between PDAC patient and healthy control blood samples (GSE49641: peripheral blood mononuclear cells; GSE74629: peripheral blood; GSE60601: classical CD14++ CD16- monocytes).
